# Supplementary material for: A combined computational and experimental study on DNA-photocleavage of Ru(ii) polypyridyl complexes [Ru(bpy)2(L)]2+ (L = pip, o-mopip and p-mopip)
Source: Royal Society of Chemistry journal article supplement (doi:10.1039/b710546k), 2007-10-26
Supplement: b710546k.pdf [file b710546k.pdf]

## Electronic supplementary information (ESI)

# A Combined Computational and Experimental Study on DNA- Photocleavage of Ru(II) Polypyridyl Complexes $[\text{Ru}(\text{bpy})_2(\text{L})]^{2+}$ (L=pip, *o*-mopip and *p*-mopip)

Lian-Cai Xu<sup>a</sup>, Shuo Shi<sup>a</sup>, Jun Li<sup>a</sup>, Si-Yan Liao<sup>a</sup>, Kang-Cheng Zheng<sup>\*a</sup>, and Liang-Nian Ji<sup>\*a,b</sup>

<sup>a</sup>The Key Laboratory of Bioinorganic and Synthetic Chemistry of Ministry of Education, School of Chemistry and Chemical Engineering, Sun Yat-Sen University, Guangzhou 510275, PR China. E-mail: [ceszkc@mail.sysu.edu.cn](mailto:ceszkc@mail.sysu.edu.cn). Fax: +86-20-8411-2245; Tel: +86-20-8411-0696

<sup>b</sup>Department of Chemistry, Tongji University, Shanghai, 200092, PR China.

E-mail: [cesjln@mail.sysu.edu.cn](mailto:cesjln@mail.sysu.edu.cn)

**Table S1** Natural Charge Populations (unit: |e|) of  $[\text{Ru}(\text{bpy})_2(\text{L})]^{3+}$  (**1**~**3**) Calculated at the Level of UHF/LanL2DZ.

| Atom     | Ru     | N <sub>1</sub> | C <sub>2</sub> | C <sub>3</sub> | C <sub>4</sub> | N <sub>5</sub> | C <sub>6</sub> | C <sub>7</sub> | C <sub>8</sub> | -OCH <sub>3</sub> | main   | co-ligand |
|----------|--------|----------------|----------------|----------------|----------------|----------------|----------------|----------------|----------------|-------------------|--------|-----------|
| <b>1</b> | 1.4533 | -0.6236        | 0.2116         | -0.0671        | 0.16187        | -0.6500        | 0.5902         | -0.1549        | -0.1385        |                   | 0.5233 | 1.0233    |
| <b>2</b> | 1.4533 | -0.6214        | 0.2090         | -0.06591       | 0.1575         | -0.6480        | 0.5841         | -0.2046        | 0.4427         | -0.2827           | 0.5297 | 1.0170    |
| <b>3</b> | 1.4529 | -0.6201        | 0.2122         | -0.0693        | 0.1573         | -0.6543        | 0.5923         | -0.1940        | -0.1323        | -0.2280           | 0.5259 | 1.0212    |

**Table S2** Calculated Thermochemical Data in Gas and the Free Energies in Aqueous Solution for All Complexes  $[\text{Ru}(\text{bpy})_2(\text{L})]^{n+}$  ( $n=1\sim 3$ ) and Excited Complex  $[\text{Ru}(\text{bpy})_2(\text{L})]^{2+}(\mathbf{1}\sim\mathbf{3})^{\text{a,b,c}}$

| L=pip                                                  | $G_{\text{gas}}^0$ | $S_{\text{tot}}^0(\text{g})$ | $G_{\text{corr}}(\text{g})$ | $H_{\text{corr}}(\text{g})$ | $\epsilon_{\text{ZPE}}$ | $\Delta E_{\text{tot}}$ | $\epsilon_{\text{scf}}^0(\text{g})$ | $G_{\text{aq}}^{\text{d}}$ |
|--------------------------------------------------------|--------------------|------------------------------|-----------------------------|-----------------------------|-------------------------|-------------------------|-------------------------------------|----------------------------|
| $[\text{Ru}(\text{bpy})_2(\text{L})]^{2+}$             | -2033.829475       | 220.192                      | 0.532802                    | 0.637422                    | 0.601001                | 0.636478                | -2034.36227729                      | -2034.528053               |
| $[\text{Ru}(\text{bpy})_2(\text{L})]^{3+}$             | -2033.413576       | 221.633                      | 0.531361                    | 0.636666                    | 0.600055                | 0.635722                | -2033.944937                        | -2034.314033               |
| $[\text{Ru}(\text{bpy})_2(\text{L})]^{1+}$             | -2034.070981       | 223.310                      | 0.527203                    | 0.633305                    | 0.596581                | 0.632360                | -2034.598184                        | -2034.633940               |
| $[\text{Ru}(\text{bpy})_2(\text{L})]^{2+}(\text{T}_1)$ |                    |                              |                             |                             |                         |                         | -2034.29243041                      | -2034.450107               |
| L=o-mopip                                              |                    |                              |                             |                             |                         |                         |                                     |                            |
| $[\text{Ru}(\text{bpy})_2(\text{L})]^{2+}$             | -2148.321367       | 230.394                      | 0.563024                    | 0.672492                    | 0.633588                | 0.671547                | -2148.88439059                      | -2149.030975               |
| $[\text{Ru}(\text{bpy})_2(\text{L})]^{3+}$             | -2147.916547       | 232.349                      | 0.561442                    | 0.671838                    | 0.632718                | 0.670894                | -2148.4779894                       | -2148.815238               |
| $[\text{Ru}(\text{bpy})_2(\text{L})]^{1+}$             | -2148.558959       | 233.236                      | 0.557725                    | 0.668543                    | 0.629345                | 0.667599                | -2149.1166843                       | -2149.136539               |
| $[\text{Ru}(\text{bpy})_2(\text{L})]^{2+}(\text{T}_1)$ |                    |                              |                             |                             |                         |                         | -2148.81099723                      | -2148.950288               |
| L=p-ompip                                              |                    |                              |                             |                             |                         |                         |                                     |                            |
| $[\text{Ru}(\text{bpy})_2(\text{L})]^{2+}$             | -2148.31220        | 232.781                      | 0.561640                    | 0.672242                    | 0.633109                | 0.671297                | -2148.87383885                      | -2149.034093               |
| $[\text{Ru}(\text{bpy})_2(\text{L})]^{3+}$             | -2147.91875        | 234.610                      | 0.560525                    | 0.671996                    | 0.632671                | 0.671051                | -2148.47927534                      | -2148.822058               |
| $[\text{Ru}(\text{bpy})_2(\text{L})]^{1+}$             | -2148.55167        | 236.066                      | 0.556030                    | 0.668193                    | 0.628764                | 0.667249                | -2149.10769591                      | -2149.140102               |
| $[\text{Ru}(\text{bpy})_2(\text{L})]^{2+}(\text{T}_1)$ |                    |                              |                             |                             |                         |                         | -2148.80296997                      | -2148.953937               |

a) All energies values in Hartrees/particle and  $S_{\text{tot}}^0(\text{g})$  in  $\text{CalM}^{-1}\text{K}^{-1}$ , b) all values were calculated at the level of UB3LYP/LanL2DZ c) the values for the excited  $[\text{Ru}(\text{bpy})_2(\text{L})]^{2+}(\text{T}_1)(\mathbf{1}\sim\mathbf{3})$  were obtained via the single point calculation with U3IYP/LanL2DZ based on the optimized geometries of the lowest triplet excited state ( $\text{T}_1$ ) d)  $G_{\text{aq}}$  were not corrected with ZPE and thermal correction, and were directly obtained via the single point calculation with U3IYP/LanL2DZ and CPCM model.
